# Supplementary material for: Comparative Analysis of the Growth, Physiological Responses, and Gene Expression of Chinese Soft-Shelled Turtles Cultured in Different Modes
Source: MDPI journal article supplement (doi:10.3390/ani14060962), 2024-03-20
Supplement: s1 [file s1]

**Table S1** The sequences of primers of qPCR for validation

|       | Genes   | Forward primer(5'-3') | Reverse primer(5'-3') | Annealing temperature |
|-------|---------|-----------------------|-----------------------|-----------------------|
| Brain | DUSP4   | GGAGGATAACCACAAGGCT   | TGTTTGACAAATTCAAAGG   | 51°C                  |
|       | CHRNA4  | GGAGAGTGGCGAATGGGT    | TTCCGTAATGAGCAGCAGG   | 58°C                  |
|       | TNC     | CATTCCTTCCACCACCGAT   | GCCTGCCTTTCTCCACCAG   | 59°C                  |
|       | DGKH    | AAGGACCTGGGGATAACGA   | CACCACACAAGAATGAAGA   | 52°C                  |
|       | TRHR    | GTGAAGATGGAGAACAGCA   | AAGTGAAAGCCCAGACAAA   | 52°C                  |
|       | EREG    | ATCCTCTTTTCTCCTCGTCG  | TGTTTCTCTCCCCCTTCAC   | 54°C                  |
|       | TSPO    | CTGCTCCTTGCCGAACCTCC  | TGCCTCCCCAAAACCCTCC   | 61°C                  |
|       | etnpp1  | ATTTC AACACGTTTGAGG   | TGTAGATGATATGCTGGGC   | 52°C                  |
|       | MRC1    | TATTTAGTCATCCGTTCCA   | CAGGCTATTGTCTGCTTTG   | 50°C                  |
|       | IL4R    | GCCATTACTGATACTCCGA   | AGTTGATTTTTTCCCCTTT   | 51°C                  |
| Gut   | PLK1    | GCCTCGGTTTTCCATTGCC   | CTTCCTTTTCTGGGTCCT    | 59°C                  |
|       | IL22    | GGGTTTTGGTGGTGGTTGT   | CTCTTTTGGAGGCATGGG    | 58°C                  |
|       | STMN1   | TGCCTACCTTCTTAGTCAT   | CAGTTTAGCAGCCATTGT    | 49°C                  |
|       | MMP3    | GGTGAAGGTATTGGTGGAG   | CAGTTGGCAGATAGGTTGG   | 52°C                  |
|       | Hspa2   | CCTGGAAGGAGGGGGTAGC   | CGAAGATGGTGTGGTGGG    | 59°C                  |
|       | Myo1e   | ATGATTTCTGCTTATTTGT   | AGTTTTCTTTGTGTTTTCT   | 44°C                  |
|       | Kpna2   | ATTTGTTGCCTTTTTGGGT   | AATGGCGTCTATGGGTGGT   | 56°C                  |
|       | CCNB1   | GAGTTCAGGGCTTTGTGGT   | GCAGTTTCGCTTCCTTTTT   | 55°C                  |
|       | CDK1    | GCACAGAGACTTAAAGCCT   | AGTTGAGTAACGAGCGGAT   | 51°C                  |
|       | PPA1    | AGGTAATCAAAACCACTCA   | GCATTTCAAACATCCATCC   | 50°C                  |
|       | PLA2G4F | ACAGAACCCCTTACCCATC   | CCAGTCCTGAACCAACCAT   | 54°C                  |
|       | SDS     | TTTTGGTATTGTTACTGCT   | CTAATGTATGTCCTGATGG   | 45°C                  |
|       | EIF4E3  | GAGCAGAGAGATGGAGGAG   | TGGGACAAAGACAGTGAGT   | 50°C                  |
|       | β-actin | TGAGCTTCGTGTAGCACCTG  | AGGATGGCATGGGGTAAAGC  | 58°C                  |

**Table S2** The RNA-Seq data for all samples of brain and gut

| Samples | Raw Datas | Clean Data(%)    | Adapter(%)    | LowQuality(%)  | polyA(%)  | N(%)         | Total_Mapped(%)  |
|---------|-----------|------------------|---------------|----------------|-----------|--------------|------------------|
| RTB-1   | 69035922  | 68597814(99.37%) | 44128 (0.06%) | 388750 (0.56%) | 0 (0.00%) | 5230 (0.01%) | 59324601(86.98%) |
| RTB-2   | 69064872  | 68608364(99.34%) | 39594 (0.06%) | 411674 (0.60%) | 0 (0.00%) | 5240 (0.01%) | 58957810(86.32%) |
| RTB-3   | 65401394  | 64955250(99.32%) | 39880 (0.06%) | 401224 (0.61%) | 0 (0.00%) | 5040 (0.01%) | 56031997(86.58%) |
| RTG-1   | 58537250  | 58110414(99.27%) | 36652 (0.06%) | 385662 (0.66%) | 0 (0.00%) | 4522 (0.01%) | 48992962(84.55%) |
| RTG-2   | 67690348  | 67212758(99.29%) | 32326 (0.05%) | 440588 (0.65%) | 0 (0.00%) | 4676 (0.01%) | 55859949(83.38%) |
| RTG-3   | 56045690  | 55733704(99.44%) | 31328 (0.06%) | 276408 (0.49%) | 0 (0.00%) | 4250 (0.01%) | 47246108(84.98%) |
| PTB-1   | 59091158  | 58728948(99.39%) | 33896 (0.06%) | 323766 (0.55%) | 0 (0.00%) | 4548 (0.01%) | 50672127(86.76%) |
| PTB-2   | 63187932  | 62673172(99.19%) | 34622 (0.05%) | 477258 (0.76%) | 0 (0.00%) | 2880 (0.00%) | 53966589(86.54%) |
| PTB-3   | 57070328  | 56660756(99.28%) | 29012 (0.05%) | 377356 (0.66%) | 0 (0.00%) | 3204 (0.01%) | 49830753(88.56%) |
| PTG-1   | 65951916  | 65460004(99.25%) | 34430 (0.05%) | 452822 (0.69%) | 0 (0.00%) | 4660 (0.01%) | 55517466(85.06%) |
| PTG-2   | 66024966  | 65582482(99.33%) | 36664 (0.06%) | 400732 (0.61%) | 0 (0.00%) | 5088 (0.01%) | 54555586(83.44%) |
| PTG-3   | 76173154  | 75663626(99.33%) | 41368 (0.05%) | 462290 (0.61%) | 0 (0.00%) | 5870 (0.01%) | 63511495(84.28%) |

**Table S3 Gene number and comparison with reference genome**

| Samples | Refer<br>Genes | Sequenced Refer<br>Genes(%) | Novel<br>Genes | Sequenced Novel<br>Genes(%) | Total<br>Genes | Sequenced Total<br>Genes(%) |
|---------|----------------|-----------------------------|----------------|-----------------------------|----------------|-----------------------------|
| All     | 24494          | 21318 (87.03%)              | 3904           | 3904 (100.00%)              | 28398          | 25222 (88.82%)              |
| RTB-1   | 24494          | 18224 (74.40%)              | 3904           | 2999 (76.82%)               | 28398          | 21223 (74.73%)              |
| RTB-2   | 24494          | 18173 (74.19%)              | 3904           | 2977 (76.26%)               | 28398          | 21150 (74.48%)              |
| RTB-3   | 24494          | 18157 (74.13%)              | 3904           | 2953 (75.64%)               | 28398          | 21110 (74.34%)              |
| RTG-1   | 24494          | 17089 (69.77%)              | 3904           | 2854 (73.10%)               | 28398          | 19943 (70.23%)              |
| RTG-2   | 24494          | 17193 (70.19%)              | 3904           | 2866 (73.41%)               | 28398          | 20059 (70.64%)              |
| RTG-3   | 24494          | 16960 (69.24%)              | 3904           | 2857 (73.18%)               | 28398          | 19817 (69.78%)              |
| PTB-1   | 24494          | 18261 (74.55%)              | 3904           | 2935 (75.18%)               | 28398          | 21196 (74.64%)              |
| PTB-2   | 24494          | 17955 (73.30%)              | 3904           | 2903 (74.36%)               | 28398          | 20858 (73.45%)              |
| PTB-3   | 24494          | 17915 (73.14%)              | 3904           | 2810 (71.98%)               | 28398          | 20725 (72.98%)              |
| PTG-1   | 24494          | 17392 (71.01%)              | 3904           | 2901 (74.31%)               | 28398          | 20293 (71.46%)              |
| PTG-2   | 24494          | 16947 (69.19%)              | 3904           | 2761 (70.72%)               | 28398          | 19708 (69.40%)              |
| PTG-3   | 24494          | 17385 (70.98%)              | 3904           | 2894 (74.13%)               | 28398          | 20279 (71.41%)              |
